# Co-Inoculation with Rhizobia and AMF Inhibited Soybean Red Crown Rot: From Field Study to Plant Defense-Related Gene Expression Analysis

Xiang Gao<sup>1</sup>, Xing Lu<sup>1</sup>, Man Wu<sup>1</sup>, Haiyan Zhang<sup>1</sup>, Ruqian Pan<sup>1,2</sup>, Jiang Tian<sup>1</sup>, Shuxian Li<sup>3</sup>, Hong Liao<sup>1\*</sup>

**1** State Key Laboratory for Conservation and Utilization of Subtropical Agro-Bioresources, Root Biology Center, South China Agricultural University, Guangzhou, China, **2** Laboratory of Bacteria and Fungicides, South China Agricultural University, Guangzhou, China, **3** Crop Genetics Research Unit, United States Department of Agriculture - Agricultural Research Service, Stoneville, Mississippi, United States of America

## Abstract

**Background:** Soybean red crown rot is a major soil-borne disease all over the world, which severely affects soybean production. Efficient and sustainable methods are strongly desired to control the soil-borne diseases.

**Principal Findings:** We firstly investigated the disease incidence and index of soybean red crown rot under different phosphorus (P) additions in field and found that the natural inoculation of rhizobia and arbuscular mycorrhizal fungi (AMF) could affect soybean red crown rot, particularly without P addition. Further studies in sand culture experiments showed that inoculation with rhizobia or AMF significantly decreased severity and incidence of soybean red crown rot, especially for co-inoculation with rhizobia and AMF at low P. The root colony forming unit (CFU) decreased over 50% when inoculated by rhizobia and/or AMF at low P. However, P addition only enhanced CFU when inoculated with AMF. Furthermore, root exudates of soybean inoculated with rhizobia and/or AMF significantly inhibited pathogen growth and reproduction. Quantitative RT-PCR results indicated that the transcripts of the most tested pathogen defense-related (PR) genes in roots were significantly increased by rhizobium and/or AMF inoculation. Among them, *PR2*, *PR3*, *PR4* and *PR10* reached the highest level with co-inoculation of rhizobium and AMF.

**Conclusions:** Our results indicated that inoculation with rhizobia and AMF could directly inhibit pathogen growth and reproduction, and activate the plant overall defense system through increasing PR gene expressions. Combined with optimal P fertilization, inoculation with rhizobia and AMF could be considered as an efficient method to control soybean red crown rot in acid soils.

**Citation:** Gao X, Lu X, Wu M, Zhang H, Pan R, et al. (2012) Co-Inoculation with Rhizobia and AMF Inhibited Soybean Red Crown Rot: From Field Study to Plant Defense-Related Gene Expression Analysis. PLoS ONE 7(3): e33977. doi:10.1371/journal.pone.0033977

**Editor:** Ching-Hong Yang, University of Wisconsin-Milwaukee, United States of America

**Received:** November 23, 2011; **Accepted:** February 20, 2012; **Published:** March 19, 2012

This is an open-access article, free of all copyright, and may be freely reproduced, distributed, transmitted, modified, built upon, or otherwise used by anyone for any lawful purpose. The work is made available under the Creative Commons CC0 public domain dedication.

**Funding:** This study was supported by National Natural Science Foundation of China (No. 30890132, 30890133 and 31025022) and National Key Basic Research Special Funds of China (2011CB100301). The funders had no role in study design, data collection and analysis, decision to publish, or preparation of the manuscript.

**Competing Interests:** The authors have declared that no competing interests exist.

\* E-mail: hliao@scau.edu.cn

## Introduction

Soybean (*Glycine max* L. Merr.) is an important legume crop, supplying protein and oil for human and animals [1]. However, soybean growth has a lot of limitations which cause great yield losses, especially in tropical and subtropical areas where the warm, moist conditions and weathered acid soils not only favor the infection and reproduction of the pathogens [2,3], but also easily lack of some essential nutrients, such as phosphorus (P) [4,5]. Heavy application of chemical pesticides and fertilizers is commonly used to prevent such growth losses, but these amendments are highly cost and could cause severe environmental problems [6,7]. Biocontrol approach should be a better alternative to solve these problems.

Red crown rot (also named black root rot) is caused by a soil-borne fungal pathogen *Cylindrocladium parasiticum* (teleomorph *Calonectria ilicicola*) [8,9]. It was firstly found in peanut in 1965 and then in soybean in 1969 [2,8]. Symptoms of soybean red

crown rot were usually observed late in the season during or after pod set. The infected plants had a black root rot and its stalk tissue was grayish or reddish brown above soil surface for 5 to 10 cm, and leaves became chlorosis and interveinal necrosis followed by defoliation [3,10]. Till now, more and more reports proved that red crown rot could be considered as one of the most serious soil-borne diseases for legumes around the world [3,8], such as in China where it made soybean yield loss over 50% [2,10].

Acid soils comprise up to 50% of the world's potentially arable land, of which syndrome causes severe yield losses in various crops, and thus significantly limit crop production worldwide [11]. In most acid soils, there are deficiencies of some essential elements, such as P, nitrogen (N), potassium (K) and some micronutrients [4,5,12]. Therefore, legumes like soybean grown in acid soils not only need to deal with diseases such as red crown rot but also need to face the nutrient deficiency problems.

Biocontrol approach by introducing microorganisms into soils has been proposed to suppress soil-borne diseases for improving

**Table 1.** Disease incidence and index caused by *Cylindrocladium parasiticum* at different P levels in field.

| P level | Disease incidence (%) |             | Disease index |             |
|---------|-----------------------|-------------|---------------|-------------|
|         | 2009                  | 2010        | 2009          | 2010        |
| NP      | 52.33±3.67b           | 51.95±1.04b | 46.35±4.68b   | 37.32±1.74b |
| HP      | 73.25±5.32a           | 63.98±4.02a | 55.63±3.54a   | 46.12±2.08a |

Note: Disease incidence and index was measured as described in Materials and Methods. HP: 80 kg P<sub>2</sub>O<sub>5</sub> ha<sup>-1</sup> added as calcium superphosphate, NP: none P fertilizer added. All the data were the mean of four replicates with SE. The different letter after numbers in the same column indicated significantly different at 0.05 ( $P < 0.05$ ).

doi:10.1371/journal.pone.0033977.t001

plant health [13]. The disease suppression by biocontrol agents is regarded sustainable via harmonization of interactions among plants, pathogens, biocontrol agents and microbial communities within rhizosphere [13,14]. Many reports found that inoculation with rhizobia and/or arbuscular mycorrhizal fungi (AMF) could promote plant growth and control fungal diseases, and thus be considered as one of the efficient biocontrol approaches [15,16]. AMF inoculation not only helped host plant growth, but also enhanced defense system and subsequently reduced disease severity on many soil-borne pathogens [17–19]. Besides biological N fixation, many studies showed legumes inoculated with rhizobia could also increase host plant defense system against soil-borne diseases [20,21]. Improvement of plant nutrition status, direct competition for invasion space, changes in root growth and morphology, as well as exudates of rhizobitoxine have been well documented as the main mechanisms underlying the inhibition of soil-borne pathogens by rhizobium and AMF inoculation [22–25]. Furthermore, increased transcripts of some plant pathogen defense-related (PR) gene expressions by inoculation with rhizobia and/or AMF might also be involved in plants against fungal pathogens [20,26]. However, most of the studies described above had been conducted in greenhouse conditions and lacked of comprehensive investigations integrating field observations with physiological and molecular evidence.

Soybean could form tripartite symbiotic associations with rhizobia and AMF simultaneously for both P and N benefits [27,28]. But until now, there is no report in whether rhizobium and/or AMF inoculation could inhibit soybean red crown rot in acid soils, and if so, what are the mechanisms underlying this inhibition? In this study, firstly, we investigated the disease incidence and index of soybean red crown rot with different P additions in acid soil field to elucidate whether the naturally inoculation of rhizobia and AMF could affect red crown rot. The

field site has been growing soybean since 2000. Soybean red crown rot caused by *C. parasiticum* was observed in this field in 2006 and its disease incidence reached to 80% [10]. And then, we combined sand culture and fungal pathogen incubation experiments as well as some important PR gene expression analysis to evaluate the possible physiological and molecular mechanisms of rhizobium and AMF inoculation on soybean red crown rot inhibition.

## Results

### Field experiments

The disease incidence and index of soybean red crown rot were significantly affected by P additions in field (Table 1). Compared to HP, the plants had lower disease incidence and index at NP. Under NP conditions, disease incidence and index was decreased by 28.56% and 18.80%, 16.68% and 19.08% in 2009 and 2010, respectively.

Plant growth in field was significantly affected by *C. parasiticum* infection as indicated by plant dry weight and grain yield (Table 2). Compared to the healthy plants, dry weight and grain yield of the infected plants had 39.82% and 40.09%, 39.06% and 47.80% reduction at NP and HP in 2009; 36.57% and 52.46%, 44.10% and 57.23% reduction in 2010, respectively. Interestingly, the growth of healthy plants was significantly affected by P addition, but not the infected plants. With P addition, the dry weight and grain yield of healthy plants increased 29.70% and 33.65%, 50.98% and 32.21% in 2009 and 2010, respectively. Same as plant growth, plant P and N content was significantly affected by *C. parasiticum* infection, but P and N content of the infected plants was not influenced by P level (Table S2). This suggested that the plant growth inhibition by *C. parasiticum* infection might be not directly affected by plant nutrient status.

Mycorrhization and nodulation of roots were significantly inhibited by *C. parasiticum* infection as indicated by AMF colonization rate, nodule number and nodule dry weight in field, respectively (Figure 1). Compared to the healthy plants, the infected plants had 17.78%, 66.67% and 75.14%; 35.75%, 72.22% and 70.31% decrease of AMF colonization rate, nodule number and dry weight at NP and HP in 2009, 15.80%, 43.36% and 65.08%; 30.25%, 55.63% and 60.23% decrease in 2010, respectively. Compared to mycorrhization, nodulation showed more severe inhibition by *C. parasiticum* infection. But AMF colonization rate was more negatively affected by P addition, especially for the healthy plants. The AMF colonization rate of the healthy plants decreased 17.02% and 13.04% at HP in 2009 and 2010 compared to NP treatment, respectively. This indicated that there were complicate interactions among mycorrhization, nodulation, *C. parasiticum* infection and P status in the field of acid soils.

**Table 2.** Plant growth affected by *Cylindrocladium parasiticum* infection and P level in field.

| P level | Plant dry weight (g/plant) |             |                |             | Grain yield (g/plant) |             |                |            |
|---------|----------------------------|-------------|----------------|-------------|-----------------------|-------------|----------------|------------|
|         | Healthy Plant              |             | Infected Plant |             | Healthy Plant         |             | Infected Plant |            |
|         | 2009                       | 2010        | 2009           | 2010        | 2009                  | 2010        | 2009           | 2010       |
| NP      | 24.11±1.25b                | 24.09±1.36b | 14.51±1.16a    | 15.28±2.39a | 8.50±0.44b            | 9.16±0.79b  | 5.18±0.42a     | 5.12±0.85a |
| HP      | 31.27±1.84a                | 36.37±2.67a | 17.17±1.66a    | 17.29±1.98a | 11.36±0.63a           | 12.11±0.87a | 5.93±0.30a     | 5.18±0.42a |

Note: Healthy plant was not infected by *C. parasiticum*; infected plant was infected by *C. parasiticum* with severe necrosis on the subterranean stem and roots, chlorosis of leaves. HP: 80 kg P<sub>2</sub>O<sub>5</sub> ha<sup>-1</sup> added as calcium superphosphate, NP: none P fertilizer added. All the data were the mean of four replicates with SE. The same letter after numbers in the same column indicated not significantly different at 0.05 ( $P < 0.05$ ).

doi:10.1371/journal.pone.0033977.t002

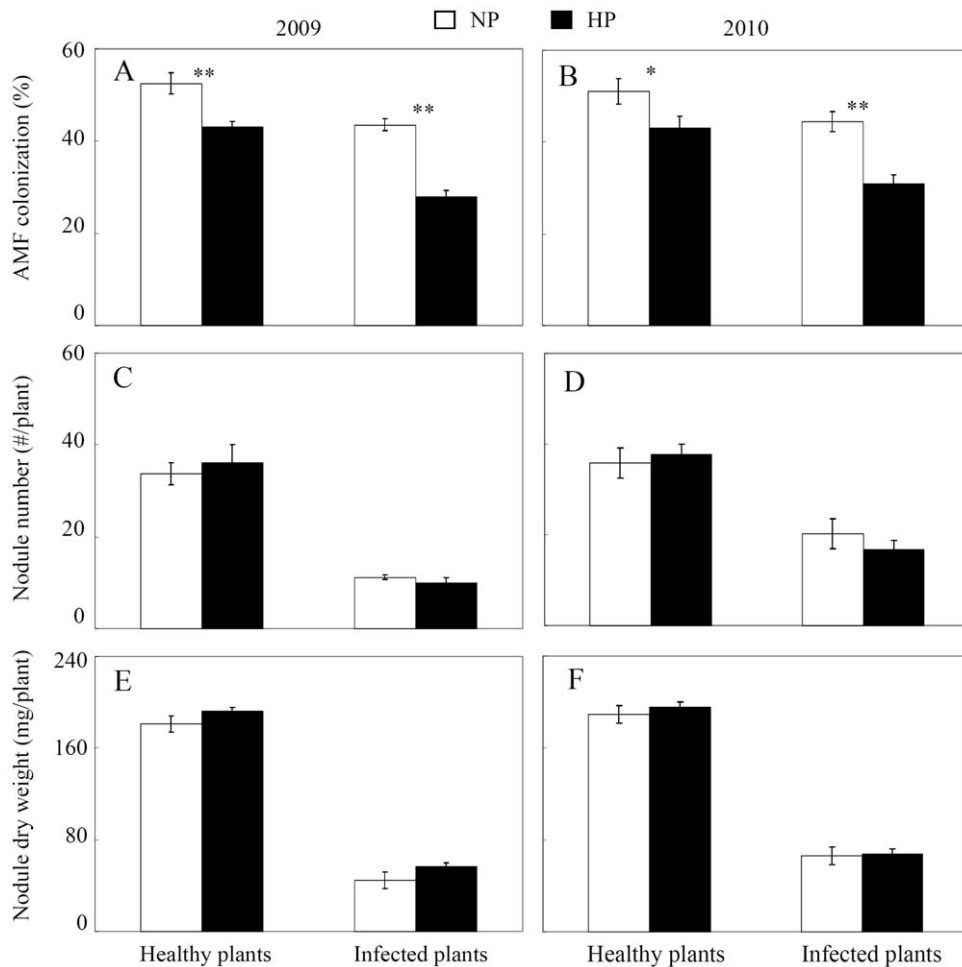

**Figure 1. AMF colonization and nodulation affected by *C. parasiticum* and P level in field.** A) and B) AMF colonization; C) and D) nodule number; E) and F) nodule dry weight. HP: 80 kg P<sub>2</sub>O<sub>5</sub> ha<sup>-1</sup> added as calcium superphosphate; NP: none P fertilizer added. Healthy plants were not infected by *C. parasiticum*, infected plants were infected by *C. parasiticum* with severe necrosis on the subterranean stem and roots, chlorosis of leaves. Each bar represented the mean of four replicates with standard error. \* and \*\* stood the significant difference between two P levels analyzed by one-way ANOVA. \*: significant at 0.05 (P<0.05); \*\*: significant at 0.01 (P<0.01). doi:10.1371/journal.pone.0033977.g001

### Sand culture experiment

In order to understand the relationships among *C. parasiticum* pathogen infection, AMF colonization and nodulation as well as plant nutrient status, a sand culture experiment was further conducted. As expected, plant growth and nutrient status were negatively affected by pathogen infection but promoted by rhizobium and AMF inoculation under both LP and HP conditions as indicated by plant dry weight, N and P content (Figure S1). Furthermore, the suppression of plant growth and nutrient status derived from pathogen infection were better rescued by co-inoculation with rhizobia and AMF. Interestingly, co-inoculation with rhizobia and AMF further increased AMF colonization rate compared to AMF inoculation alone, and *vice versa*. The P availability imposed positive effects on nodulation but negative effects on mycorrhization as indicated by nodule number and nodule dry weight as well as AMF colonization rate, respectively (Figure S2).

We found that the disease incidence and index of soybean red crown rot were dramatically decreased after rhizobium and/or AMF inoculation in sand culture (Figure 2), indicating that symbiotic inoculation could not only lower the pathogen colonization but also reduce the root rot severity. Plants co-inoculated with rhizobia and AMF always had the lowest disease

incidence and index, especially at low P level. Furthermore, the disease incidence and index decreased from 78.65% and 35.60 without inoculation to about 45% and 15, with rhizobial or AMF inoculation, and further decreased to 22.93% and 8.64 with co-inoculation at low P level, showing significant interactions between rhizobium and AMF inoculation on pathogen control. Interestingly, we found that both tap root and lateral roots where AMF and rhizobia colonized had less microsclerotia (Figure 2C and 2D), implying that space competition might be occurred among AMF, rhizobium and *C. parasiticum* infection.

To further investigate the effects of symbiotic inoculation on *C. parasiticum* pathogen colony growth in roots, we measured CFU and found that the CFU caused by *C. parasiticum* was significantly inhibited by rhizobium and AMF inoculation (Figure 3). The CFU amounts were 57.78%, 52.89% and 73.33% lower under +R-A, -R+A and +R+A treatments compared to -R-A at LP level, respectively. P addition only significantly enhanced the *C. parasiticum* pathogen growth when inoculated with AMF as indicated by 58.02% and 40.42% increase of CFU under -R+A and +R+A treatments at HP, respectively.

The growth of *C. parasiticum* pathogen was significantly inhibited by the exudates from the roots inoculated with rhizobia and/or

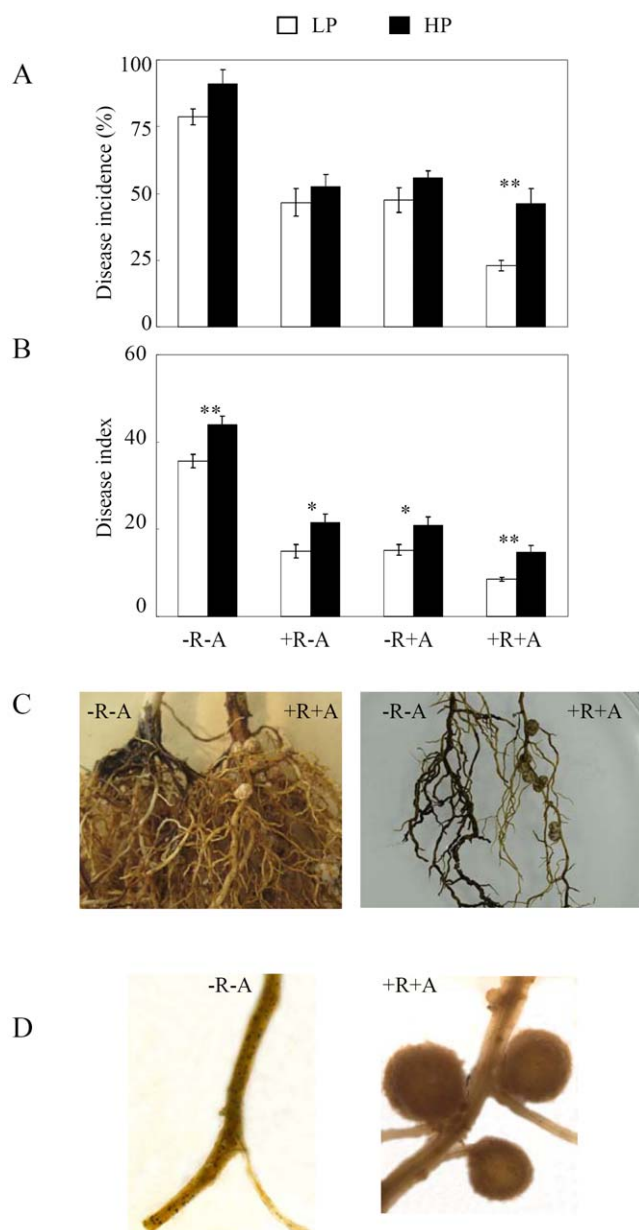

**Figure 2. Disease incidence and index of soybean red crown rot affected by *C. parasiticum* infection, rhizobia and AMF inoculation as well as P level in the sand culture experiment.** A) disease incidence; B) disease index; C) pictures of *C. parasiticum* infection, rhizobia and AMF inoculation on tap root (left) and lateral roots (right); D) microsclerotia in the roots. LP, 15  $\mu\text{mol}$  P added as  $\text{KH}_2\text{PHO}_4$ ; HP, 500  $\mu\text{mol}$  P added as  $\text{KH}_2\text{PHO}_4$ . Disease incidence and index was measured as described in Materials and Methods. All the roots were inoculated with *C. parasiticum* (see Materials and Methods for details). -R-A: roots without AMF and rhizobia inoculation; +R-A: roots inoculated by rhizobia; -R+A: roots inoculated by AMF; +R+A: roots inoculated by rhizobia and AMF. Each bar represented the mean of eight replicates with standard error. \* and \*\* stood the significant difference between two P levels analyzed by one-way ANOVA. \*: significant at 0.05 ( $P < 0.05$ ); \*\*: significant at 0.05 ( $P < 0.01$ ). doi:10.1371/journal.pone.0033977.g002

AMF under different P conditions as indicated by pathogen colony diameter and sporulation, especially at LP (Figure 4). In comparison with control, the addition of 2 mL root exudates from plants with rhizobium and/or AMF inoculation dramatically

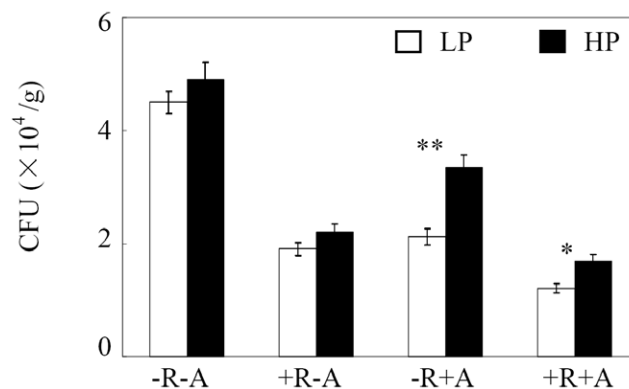

**Figure 3. *C. parasiticum* pathogen growth affected by rhizobia and AMF inoculation as well as P level in the sand culture experiment.** LP, 15  $\mu\text{mol}$  P added as  $\text{KH}_2\text{PHO}_4$ ; HP, 500  $\mu\text{mol}$  P added as  $\text{KH}_2\text{PHO}_4$ . All the roots were inoculated with *C. parasiticum* (see Materials and Methods for details). CFU: colony forming units per gram root sample. -R-A: roots without AMF and rhizobia inoculation; +R-A: roots inoculated by rhizobia; -R+A: roots inoculated by AMF; +R+A: roots inoculated by rhizobia and AMF. Each bar represented the mean of four replicates with standard error. \* and \*\* stood the significant difference between two P levels analyzed by one-way ANOVA. \*: significant at 0.05 ( $P < 0.05$ ); \*\*: significant at 0.05 ( $P < 0.01$ ). doi:10.1371/journal.pone.0033977.g003

inhibited pathogen growth (Figure 4A). Under LP conditions, the pathogen colony diameter and sporulation of *C. parasiticum* decreased 27.36% and 55.31% after co-inoculation with rhizobia and AMF compared to control, showing the strong synergistic interactions between rhizobium and AMF inoculation on inhibiting *C. parasiticum* growth. This suggested that the symbiotic inoculation induced/enhanced the ability of host plants to secrete some or more defense-compounds to control pathogen infection. Furthermore, there were four phenolic acids detected in the root exudates (Table 3). Among them, roots from the -R-A treatment only released gallic acid, and the concentration was enhanced by rhizobia and/or AMF inoculation. Interestingly, the other three detected phenolic acids, including ferulic acid, cinnamic acid and salicylic acid were only secreted from the roots inoculated with rhizobia and/or AMF at both P levels, indicating that the changes of phenolic acids in root exudates might be the main compounds controlling the pathogen infection in current conditions.

#### Plant defense-related gene expression analysis

Quantitative RT-PCR was used to assay expression patterns of 8 pathogen defense-related (PR) genes in both roots and leaves. Results showed that the transcripts of the most tested genes in roots were significantly increased by rhizobium and/or AMF inoculation, which was partly dependent on P availability (Figure 5). Except that significant responses of *PR12* to rhizobium and/or AMF inoculation were only observed at 3 DAI (Day After Inoculation), transcripts of the other 7 genes were significantly increased at both 1 and 3 DAI. Furthermore, the genes responded differentially to rhizobium and/or AMF inoculation. Among them, transcription levels of *PR2*, *PR3*, *PR4* and *PR10* reached the highest level with co-inoculation of rhizobium and AMF. However, the most transcripts of *PR12*, *PPO* and *PAL* were observed at AMF inoculation. Interestingly, transcripts of some genes with rhizobium and/or AMF inoculation were up-regulated by P application, especially at 3 DAI. For example, *PR3*, *PR4*, *PR10* and *PAL* with rhizobium inoculation, *PR10*, *PPO* and *PAL* at AMF inoculation, *PR3* and *PR4* at rhizobium and AMF co-

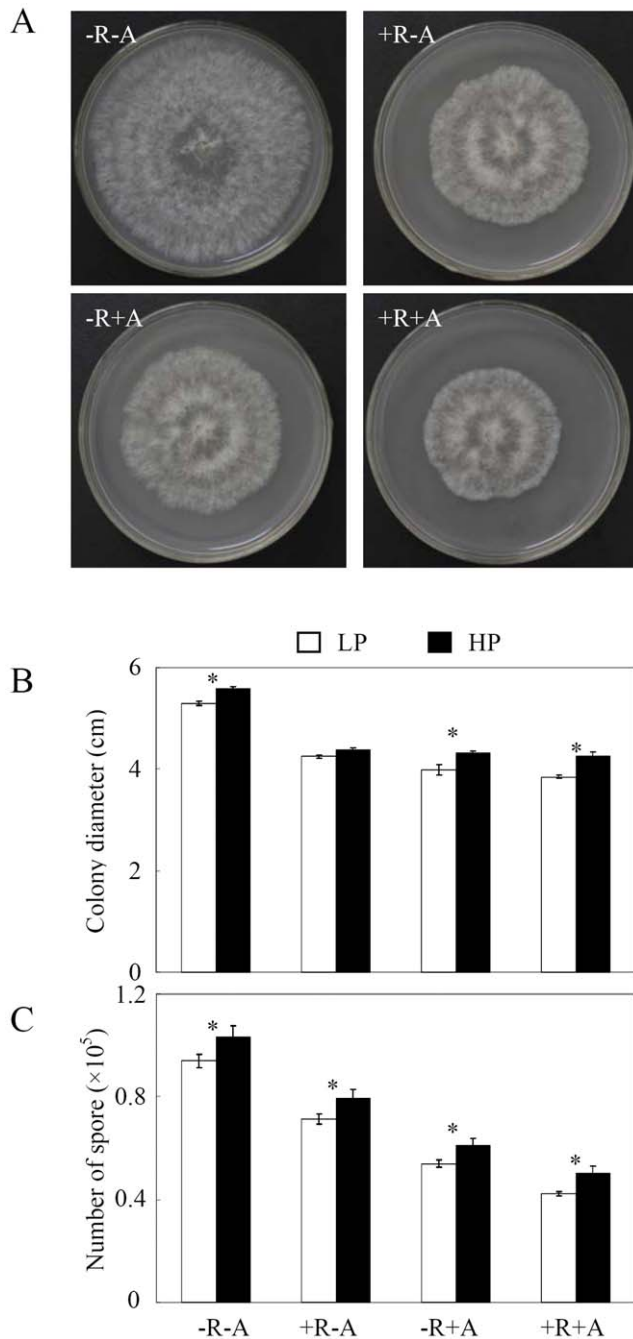

**Figure 4. Mycelial radial growth and sporulation of *C. parasiticum* affected by the exudates from the roots with rhizobia and/or AMF inoculation as well as P level.** LP, 15  $\mu\text{mol}$  P added as  $\text{KH}_2\text{PO}_4$ ; HP, 500  $\mu\text{mol}$  P added as  $\text{KH}_2\text{PO}_4$ . a) pictures of pathogen colony at LP; b) colony diameter of pathogen; c) number of spores. -R-A: roots without AMF and rhizobia inoculation; +R-A: roots inoculated by rhizobia; -R+A: roots inoculated by AMF; +R+A: roots inoculated by rhizobia and AMF. Each bar represented the mean of four replicates with standard error. \* and \*\* stood the significant difference between two P levels analyzed by one-way ANOVA. \*: significant at 0.05 ( $P < 0.05$ ); \*\*: significant at 0.01 ( $P < 0.01$ ). doi:10.1371/journal.pone.0033977.g004

inoculation exhibited higher expression levels with P application at 3 DAI.

Similar responses of the genes to rhizobium and/or AMF inoculation were also observed in leaves (Figure S3). However, the

**Table 3.** The concentration of phenolic acids ( $\mu\text{g}\cdot\text{g}^{-1}$  root DW) in root exudates from different treatments at flowering stage detected by HPLC.

| Treatment | Ferulic acid    | Gallic acid     | Cinnamic acid   | Salicylic acid  |
|-----------|-----------------|-----------------|-----------------|-----------------|
| LP -R-A   | -               | 1.03 $\pm$ 0.13 | -               | -               |
| LP +R-A   | 1.78 $\pm$ 0.16 | 0.79 $\pm$ 0.08 | -               | 1.67 $\pm$ 0.17 |
| LP -R+A   | 2.11 $\pm$ 0.18 | -               | 0.87 $\pm$ 0.06 | -               |
| LP +R+A   | 2.31 $\pm$ 0.21 | 1.32 $\pm$ 0.12 | 1.33 $\pm$ 0.11 | 1.71 $\pm$ 0.15 |
| HP -R-A   | -               | 0.37 $\pm$ 0.04 | -               | -               |
| HP +R-A   | 1.34 $\pm$ 0.12 | 1.84 $\pm$ 0.17 | -               | 2.11 $\pm$ 0.22 |
| HP -R+A   | 2.05 $\pm$ 0.22 | -               | 0.76 $\pm$ 0.06 | -               |
| HP +R+A   | 1.83 $\pm$ 0.15 | 1.51 $\pm$ 0.13 | 0.83 $\pm$ 0.09 | 1.86 $\pm$ 0.19 |

Note: "-" refers to not detectable; LP, 15  $\mu\text{mol}$  P added as  $\text{KH}_2\text{PO}_4$ ; HP, 500  $\mu\text{mol}$  P added as  $\text{KH}_2\text{PO}_4$ . -R-A: roots without AMF and rhizobia inoculation; +R-A: roots inoculated by rhizobia; -R+A: roots inoculated by AMF; +R+A: roots inoculated by rhizobia and AMF. All the data were the mean of four replicates with SE. doi:10.1371/journal.pone.0033977.t003

highest responses of 6 genes to rhizobium inoculation were observed, including *PR2*, *PR3*, *PR4*, *PR10*, *PR12* and *PPO*. The other 2 genes responded mostly to AMF inoculation, including *PR1* and *PAL*. Furthermore, P availability was also involved in regulating expression patterns of the genes. Except *PAL*, transcripts of all the other genes were increased by P application at rhizobium inoculation at 1DAI. At 3 DAI, P application also resulted in increasing transcripts of the genes, including *PR1*, *PR2* and *PR3* at rhizobium inoculation, *PR1*, *PR2*, *PR4* and *PAL* at AMF inoculation.

## Discussion

The severe yield losses caused by red crown rot have been estimated to be as high as 50% [2,10]. In earlier reports, the research of the relationship between symbionts and pathogens was mostly conducted in greenhouse or laboratory under better controlled conditions [29,30], but no report has been carried out in both field and greenhouse. Therefore, our study should be the first comprehensive research combined field, sand culture as well as pathogen incubation experiments, from phenotype to physiological and molecular analysis to elucidate the underlying relationships and mechanisms among symbionts and soybean red crown rot as well as P application in acidic red soils.

In this study, we found that inoculation with rhizobia or AMF could inhibit soybean red crown rot happening and development, and co-inoculation get more effective results than using a single microsymbiont in sand culture (Figure 2). From the field experiment, we also found that mycorrhization and nodulation of roots were significantly inhibited by *C. parasiticum* infection (Figure 1), implying that under the condition of simultaneously inoculated by indigenous rhizobia, AMF and pathogen in field, there might be vital competition and antagonism effects occurred. Firstly, rhizosphere colonization was important not only as the first step in pathogenesis of soil borne microorganisms but also was crucial in the application of microorganisms for beneficial purposes [31]. Rhizobia and AMF should be able to compete with pathogens through efficiently colonizing the rhizosphere of the plants [22,32]. Secondly, rhizobia and AMF might compete for the colonizing sites of plant roots with pathogens, and thus protect plants out of pathogen infection as the roles of most biocontrol agents [32,33]. This competition

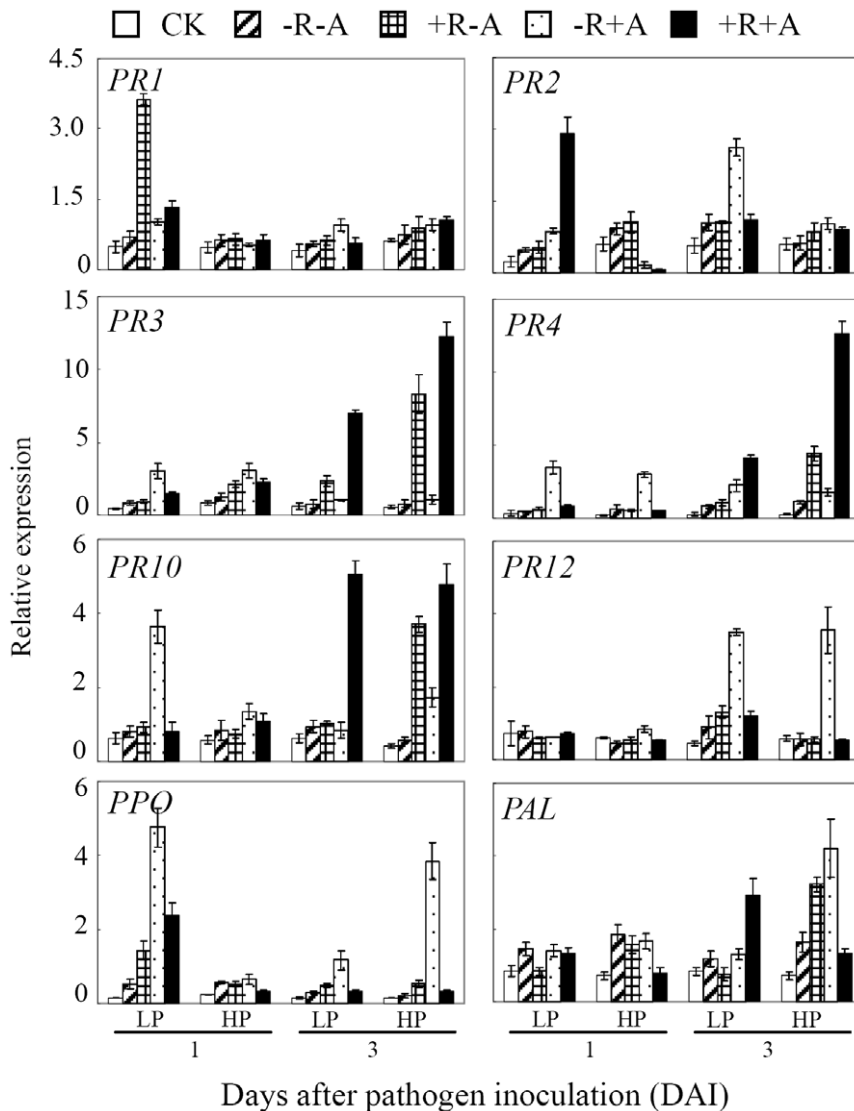

**Figure 5. Expression changes of eight defense-related genes in roots of soybean in response to *C. parasiticum* infection and rhizobia and/or AMF inoculation as well as P level.** LP, 15  $\mu\text{mol}$  P added as  $\text{KH}_2\text{PO}_4$ ; HP, 500  $\mu\text{mol}$  P added as  $\text{KH}_2\text{PO}_4$ . Except CK, all the roots were inoculated with *C. parasiticum* (see Materials and Methods for details). CK: roots without *C. parasiticum*, AMF and rhizobia inoculation; -R-A: roots without AMF and rhizobia inoculation; +R-A: roots inoculated by rhizobia; -R+A: roots inoculated by AMF; +R+A: roots inoculated by rhizobia and AMF. Each bar represented the mean of three biological replicates with standard error. doi:10.1371/journal.pone.0033977.g005

effect could be supported by our results from sand culture that tap root and lateral roots colonized by AMF and rhizobia had less pathogen microsclerotia (Figure 2C). Furthermore, preventing growth and proliferation of phytopathogens through the toxic metabolites produced by rhizobium and AMF is another well accepted mechanism of biocontrol agents [34–36]. We found that the root exudates from nodulated and/or AMF colonized roots directly interfered with the growth and proliferation of pathogens *in vitro* (Figure 4), which suggested that more antibiotics might be produced by plants when inoculated with rhizobia and/or AMF, and thus reduce pathogen growth and proliferation. In our study, we found that the phenolic acids in the root exudates were coincidentally enhanced by rhizobia and/or AMF inoculation (Table 3). Therefore, we speculated that the phenolic acids in the root exudates might be the critical biological control substances for *C. parasiticum* infection in soybean. The detailed mechanisms are needed to be further elucidated.

Moreover, it has been well documented that inoculation with rhizobia and/or AMF had potential impacts to the disease occurrence and development [37,38], which probably due to the increase of plant growth and nutrient status after roots colonized by rhizobia and AMF [39,40]. However, in our study, we found that even P fertilizer addition in both field and sand culture experiments enhanced plant growth, N and P nutrition (Table 2 and Table S2), but also increased the disease incidence and index of red crown rot no matter inoculation with rhizobia and AMF or not (Table 1 and Figure 2), indicating that direct promotion of plant growth and nutrient status is not the mechanism of the inhibition effect of rhizobium and AMF inoculation on *C. parasiticum* infection. The similar results are also found in many garden plants that P application increase the severity of disease caused by *Sclerotinia sclerotiorum* [41,42]. Furthermore, high P availability has been demonstrated to play opposite roles in nodulation and mycorrhization as indicated by enhanced

nodulation but suppressed mycorrhization with increasing P availability [28]. We also found that P addition significantly decreased AMF colonization rate in both field and sand culture (Figure 1 and Figure S2), implying that the increased disease incidence and index of *C. parasiticum* could be partly due to the decrease of AMF colonization rate. This is also supported by the results of root pathogen colony growth from sand culture. The CFU only enhanced by high P when inoculated with AMF (Figure 3). Therefore, for using rhizobia and AMF inoculation to control soybean red crown rot in acid soils, proper P application should be further considered.

In addition, activation of specific plant defense mechanisms in response to symbiont colonization is also an obvious basis for the protective behavior of rhizobia and AMF [20,43,44]. Compounds associated with plant defense included, but not limited to, phytoalexins, chitinases,  $\beta$ -1, 3-glucanases, pathogenesis related proteins, callose and phenolics [17,45,46]. In legumes, a number of genes encoding pathogenesis related proteins have been showed to be locally and systemically up-regulated after inoculation with pathogens [47–49]. Furthermore, the increase of some specific plant defense-related (PR) gene expressions to rhizobium and/or AMF colonization has been reported to against fungal pathogens [24,26]. For example, inoculation with rhizobium could induce the PR genes involved in phytoalexin synthesis and made plants primed for against the fungal pathogen, and then reduce the severity of disease [26]. Phenolics were observed in rhizobium treated seedlings against the pathogen infection, which might be controlled by *PAL* [50]. Mycorrhization also amplified the accumulation of the PR genes and phytoalexins synthesis in fungal pathogen infected [51–53]. Our results through q-PCR analysis found that inoculation with rhizobia and/or AMF could significantly increase the expression of most selected PR genes in both roots and leaves at 1 and 3 DAI (Figure 5), especially under co-inoculation conditions. This indicated that inoculation with rhizobia and/or AMF in our study activated both local and systemic defense systems in a short- and long-term way in soybean plants. The similar elicitation via AMF and rhizobia symbiosis to activate specific defense reactions and predispose an early response when attacked by a root pathogen has been found in legumes [17,53]. Interestingly, we also found that inoculation with rhizobia up-regulated more PR genes in roots, but AMF up-regulated more in leaves (Figure 5 and Figure S3), suggesting that the plant responds to rhizobium and AMF inoculation through different defense systems. Plants prefer to activate local defense systems to rhizobium inoculation, but systemic defense systems to AMF inoculation. Co-inoculation could activate both defense systems and result in better pathogen inhibition.

Take together, our study firstly showed that inoculation with rhizobia and AMF could decrease soybean red crown rot occurrence and development, through direct evidence in inhibition of pathogen growth and reproduction, and enhancement of some PR gene expressions. The study indicated that the biocontrol method and nutrient management, like inoculation with rhizobia and AMF and optimal P fertilization, could be considered as an efficient method to control soybean red crown rot in acid soils, and therefore apply practical measure for sustainable soybean production.

## Materials and Methods

### Field experiments

Soybean genotype HN112 was grown on acidic red soils at Boluo (E114.28°, N23.18°) experimental site of South China Agricultural University in Guangdong Province of China in 2009

and 2010. Basic soil chemical characteristics were as follows: pH, 5.37; organic matter, 17.63 g kg<sup>-1</sup>; available P (Bray I method), 15.68 mg P kg<sup>-1</sup>; available nitrogen, 86.64 mg N kg<sup>-1</sup>; available potassium, 75.28 mg K kg<sup>-1</sup>.

There were two P levels, including high P (80 kg P<sub>2</sub>O<sub>5</sub> ha<sup>-1</sup> added as calcium superphosphate, HP) and low P (none P fertilizer added, NP). The P fertilizer was applied to the topsoil by spread application. Each treatment had four replicates in a randomized complete block design with 8 plots in total. Each plot had an area of 18 m<sup>2</sup> and the planting density was 21 plants m<sup>-2</sup> (40 cm between rows, 15 cm between plants). The experimental field was managed following local farmer's practices. Seventy days after planting, 100 plants were examined in each plot for the damage caused by red crown rot. Two representative healthy and infected plants were harvested from each replicate for further analysis. Plant dry weight, grain yield, plant N and P content, nodule number, nodule dry weight and AMF colonization rate were measured after harvest. Plants and nodules were dried at 105°C for 30 min, and then kept at 75°C till completely dry to determine dry weight. Total N and P content were measured using the semi-micro Kjeldahl procedure with a N analyzer (Kjedahl 2300; FOSS, Hoganas, Sweden) and phosphorus-molybdate blue color reaction, respectively [54].

Disease incidence was defined as the percentage of diseased subterranean stems. Disease severity was recorded for each plant on a 0–5 scale according to Nishi [55]: i.e., 0 = no visible symptoms; 1 = small necrotic lesions on the subterranean stem; 2 = necrotic lesions extending around the subterranean stem, 3 = necrotic lesion on the subterranean stem extending to the groundline; 4 = severe necrosis on the subterranean stem and roots, leaf chlorosis; 5 = plant dead. Disease index was summarized within each plot as  $\{[(n_1 \times 1) + (n_2 \times 2) + (n_3 \times 3) + \dots + (n_N \times N)] / [N \times (n_1 + n_2 + n_3 + \dots + n_N)]\} \times 100$ , where  $n_1 \dots n_N$  was the number of subterranean stems in each of the respective disease categories, N was the highest scoring of the disease [56]. Fifty roots of each plot with 1 cm length were sampled for AMF assay. The roots were cleared by 10% KOH for 7 days, and stained with 5% ink-vinegar solution according to the procedure of Vierheilig [57]. Total AMF colonization rate of roots was determined as the percentage of root length colonized by AMF using the intersection method.

### Sand culture experiment

The sand culture experiment was conducted in the greenhouse of Root Biology Center at South China Agricultural University using soybean genotype HN112 as plant materials. Each pot consisted of 2 kg of silica sand and 6 soybean plants. The silica sand was sterilized by autoclave on two consecutive days for 40 min at 121°C. There were 3 factors including P level, pathogen infection and symbiotic inoculation, and thus 16 treatments in total. Two P levels were HP (500  $\mu$ M P added as KH<sub>2</sub>PO<sub>4</sub>) and LP (15  $\mu$ M P added as KH<sub>2</sub>PO<sub>4</sub>). Pathogen infection was treated as added *C. parasiticum* spore suspensions or sterilized spore suspensions as control. For symbiotic inoculation, there were 4 inoculation levels: rhizobium inoculation alone (+R–A, 20 mL rhizobia liquid per pot), AMF inoculation alone (–R+A, 100 g AMF inoculants per pot), co-inoculation with rhizobium and AMF (+R+A, 20 mL rhizobia liquid and 100 g AMF inoculants per pot) and none inoculation as control (–R–A, 100 g sterilized AMF inoculants and 20 mL sterilized rhizobia liquid per pot). Inoculants with rhizobium and/or AMF was mixed with silica sand before planting. There were 8 replicates for each treatment in this study.

The pathogen used in this study was *C. parasiticum* (GenBank Accession No. GU073284) isolated from the infected soybean

roots in Boluo field site [10]. Spore suspensions of plant pathogens were obtained from 14-day-old V8-juice media which were collected by adding 10 mL of sterile water to each Petri dish and rubbing the surface with a sterile L-shaped spreader. The suspension was subsequently filtered through 3-layers of cheese-cloth. The spore concentration was determined using a hemacytometer and adjusted to  $1 \times 10^5$  spores per mL.

The rhizobium inoculant was made by *Bradyrhizobium* sp. BXYD3 with MPN value of  $1 \times 10^9$  rhizobia per mL of liquid [58]. The original AMF inoculum was *Glomus mosseae* from maize (*Zea mays* L.) with MPN value as 300 propagules per gram of soils. The AMF inoculants were a mixture of the infected maize roots, spores and mycelium [58]. AMF and rhizobium inoculants were mixed into sand before planting. Thirty days after planting, plant stem base was infected with 20 mL *C. parasiticum* spore suspensions each pot. Plants were irrigated once every day with modified 1/2 strength Hoagland nutrient solution with either of the two P additions as mentioned above [12]. Sixty days after planting, plants were investigated the damage caused by red crown rot as described above, and then harvested. Plant dry weight, N and P content, nodule number, nodule dry weight, AMF colonization were measured as mentioned above. The microsclerotia in the roots were observed under a Stereo microscope (Leica, M165C, Germany).

#### Determination of root infection by *Cylindrocladium parasiticum*

In order to determine the root infection by *C. parasiticum*, root colony forming unit (CFU) was measured 30 days after pathogen inoculation in sand, randomly selected soybean roots were cut into 1 cm segments and washed thoroughly and surface-sterilized with 0.5% (v/v) NaClO for 3 min, rinsed three times in sterilized water, and then blotted on sterilized filter paper. About 1 g root segments were ground in 50 mL of sterile deionized water using a blender at high speed for 1 min [59]. The homogenized root suspension was diluted 10 folds with sterile deionized water. 100  $\mu$ L dilution was placed and evenly spread on Rose Bengal Medium with a sterile glass rod for 4 plates. There were 4 replicates and thus 16 plates for each treatment. All plates were incubated at 28°C in dark for 4 days. Colonies of *C. parasiticum* were identified and counted on each plate to determine the CFUs per gram of roots for each treatment.

Root exudates of soybean seedlings infected by *C. parasiticum* from the sand culture experiments were collected at flowering stage, and then added to V8-juice medium during *C. parasiticum* incubation for studying the effects of root exudates on mycelial radial growth and sporulation of *C. parasiticum*. Roots were gently taken out of the sand and washed with deionized water. The cleaned roots were submerged in a plastic cup containing 500 mL of 0.5  $\mu$ M CaCl<sub>2</sub> to collect exudates for 6 hours. Root exudates were filtered by 0.45  $\mu$ m Millipore membrane and stored at -20°C. During collection, each cup containing 3 seedlings were covered by a black plastic lid to avoid contamination and light. The grown diameter and sporulation of pathogen was conducted by adding 2 mL root exudates to V8-juice medium before it was solidified to give a total volume of 20 mL per Petri dish. Plates were incubated at 28°C in dark, the colony diameter and sporulation of *C. parasiticum* was determined on 5 and 14 days after incubation. For phenolic acid detection, the root exudates were firstly evaporated in a rotary evaporator (Free Zone Freeze Dry Systems, LABCONCO, USA), and then analyzed by HPLC (Agilent 1200, USA) according to Banwart [60].

#### Plant defense-related gene expression analysis

In order to study the responses of plant defense-related genes to *C. parasiticum* infection, AMF and rhizobia inoculation, total RNA from leaves and roots of soybean plants were separately extracted according to Guo [61]. Thirty-day soybean seedlings grown in sand at both low P and high P levels were used in this study. Leaves and roots for each treatment were randomly harvested at 0, 1, 2, 3 days after pathogen inoculation, respectively. Leaves and roots were washed with tap water and immediately frozen in liquid nitrogen. Total RNA was extracted and isolated according to the method of Plant RNA Mini Kit as described by the manufacturer (Omega, GA, USA). First strand cDNA was synthesized from the 1  $\mu$ g of total RNA using ImProm-II<sup>TM</sup> Reverse transcription system according to the manufacturer's instructions (Promega, Madison, USA). All the reactions were done on a Rotor-Gene 3000 (Corbett Research, Australia). The soybean housekeeping gene *EF1- $\alpha$*  (Accession number: X56856) was used as endogenous control to normalize the samples. Eight plant defense-related genes were selected to verify their expression patterns by quantitative real time-PCR (qRT-PCR). The specific primer sequences and putative functions of the tested plant defense-related genes were listed in Table S1.

#### Data Analysis

All the data in the experiments were statistically analyzed by ANOVA using Excel 2003 software (Microsoft Corporation, 1985–2003) and SAS 8.1 (SAS Inc., Cary, NC, USA).

#### Supporting Information

**Figure S1 Plant dry weight, P and N content affected by *C. parasiticum* infection, rhizobia and AMF inoculation as well as P level in sand culture experiment.** A) plant dry weight; B) plant P content; C) plant N content. LP, 15  $\mu$ mol P added as KH<sub>2</sub>PHO<sub>4</sub>; HP, 500  $\mu$ mol P added as KH<sub>2</sub>PHO<sub>4</sub>. Besides CK, all the roots were inoculated with *C. parasiticum* (see Materials and Methods for details). CK: roots without *C. parasiticum*, AMF and rhizobia inoculation; -R-A: roots without AMF and rhizobia inoculation, +R-A: roots inoculated by rhizobia, -R+A: roots inoculated by AMF, +R+A: roots inoculated by rhizobia and AMF. Each bar represents the mean of four replicates with standard error. (TIF)

**Figure S2 AMF colonization, nodule number and dry weight affected by *C. parasiticum*, rhizobia and AMF inoculation as well as P level in sand culture experiment.** A) nodule number; B) nodule dry weight; C) AMF colonization. LP: 15  $\mu$ mol P added as KH<sub>2</sub>PHO<sub>4</sub>; HP: 500  $\mu$ mol P added as KH<sub>2</sub>PHO<sub>4</sub>. Besides CK, all the roots were inoculated with *C. parasiticum* (see Materials and Methods for details). CK: roots without *C. parasiticum*, AMF and rhizobia inoculation; -R-A: roots without AMF and rhizobia inoculation, +R-A: roots inoculated by rhizobia, -R+A: roots inoculated by AMF, +R+A: roots inoculated by rhizobia and AMF. Each bar represents the mean of four replicates with standard error. (TIF)

**Figure S3 Expression changes of eight defense-related genes in leaves of soybean in response to *C. parasiticum* infection and rhizobia and/or AMF inoculation as well as P level.** LP, 15  $\mu$ mol P added as KH<sub>2</sub>PHO<sub>4</sub>; HP, 500  $\mu$ mol P added as KH<sub>2</sub>PHO<sub>4</sub>. Except CK, all the roots were inoculated with *C. parasiticum* (see Materials and Methods for details). CK: roots without *C. parasiticum*, AMF and rhizobia inoculation;



–R–A: roots without AMF and rhizobia inoculation; +R–A: roots inoculated by rhizobia; –R+A: roots inoculated by AMF; +R+A: roots inoculated by rhizobia and AMF. Each bar represented the mean of three biological replicates with standard error.  
(TIF)

**Table S1 Real Time PCR primers designed for this study.**  
(DOC)

**Table S2 Plant N and P content affected by *C. parasiticum* infection and P level in field.**  
(DOC)

## References

- Messina MJ (1999) Legumes and soybeans: overview of their nutritional profiles and health effects. *Am J Clin Nutr* 70: 439–450.
- Berggren GT, Snow JP (1989) Red crown rot. *Compendium of soybean disease*. 3rd ed JB. Sinclair, PA. Backman, eds. American Phytopathological Society. St. Paul, MN, pp 44–45.
- Kuruppu P, Schneider R, Russin J (2004) Factors affecting soybean root colonization by *Calonectria illicicola* and development of red crown rot following delayed planting. *Plant Dis* 88: 613–619.
- Kochian LV, Hoekenga OA, Piñeros MA (2004) How do crop plants tolerate acid soils? Mechanisms of aluminum tolerance and phosphorus efficiency. *Annu Rev Plant Biol* 55: 459–493.
- Yan XL, Wu P, Ling HQ, Xu GH, Xu FS, et al. (2006) Plant nutrionics in China: an overview. *Ann Bot* 98: 473–482.
- Gan YT, Siddique KH, Macleod WJ, Jayakumar P (2006) Management options for minimizing the damage by ascochyta blight (*Ascochyta rabiei*) in chickpea (*Cicer arietinum* L.). *Field Crops Res* 97: 121–134.
- Gil S, Haro R, Oddino C, Kearney M, Zuza M, et al. (2008) Crop management practices in the control of peanut diseases caused by soil-borne fungi. *Crop Prot* 27: 1–9.
- Bell DK, Sobers EK (1966) A peg, pod and root necrosis of peanuts caused by a species of *Calonectria*. *Phytopathology* 56: 1361–1364.
- Crous PW, Wingfield MJ, Alfenas AC (1993) *Cylindrocladum parasiticum* sp. nov, a new name for *Crotalariae*. *Mycol Res* 97: 889–896.
- Guan M, Pan R, Gao X, Xu D, Deng Q, et al. (2010) First report of red crown rot caused by *Cylindrocladum parasiticum* on soybean in Guangdong, Southern China. *Plant Dis* 94: 485.
- von Uexküll HR, Mutert E (1995) Global extent, development and economic impact of acid soils. In RA. date, NJ. Grundom, GE. raymet, ME. Probert, eds. *Plant-Soil Interactions at Low pH: Principles and Management* Kluwer Academic Publisher, Dordrecht, The Netherlands. pp 5–19.
- Liao H, Wan HY, Shaff J, Wang XR, Yan XL, et al. (2006) Phosphorus and Aluminum interactions in soybean in relation to aluminum tolerance. Exudation of specific organic acids form different regions of the intact root system. *Plant Physiol* 141: 674–684.
- Handelsman J, Stabb EV (1996) Biocontrol of soilborne plant pathogens. *Plant Cell* 8: 1855–1869.
- Whipps JM (2001) Microbial interactions and biocontrol in the rhizosphere. *J Exp Bot* 52: 487–511.
- Chandanie WA, Kubota M, Hyakumachi M (2006) Interactions between plant growth promoting fungi and arbuscular mycorrhizal fungus *Glomus mosseae* and induction of systemic resistance to anthracnose disease in cucumber. *Plant Soil* 286: 209–217.
- Pozo MJ, Azcon-Aguilar C (2007) Unraveling mycorrhiza-induced resistance. *Curr Opin Plant Biol* 10: 393–398.
- Gianinazzi-Pearson V, Gollotte A, Dumas-Gaudot E, Franken P, Gianinazzi S (1994) Gene expression and molecular modifications associated with plant responses to infection by arbuscular mycorrhizal fungi. In: Daniels M, Downie JA, Osbourn AE, eds. *Advances in molecular genetics of plant microbes interactions* Kluwer, Dordrecht. pp 179–186.
- Kosuta S, Chabaud M, Lounnon G, Gough C, Denarie J, et al. (2003) A diffusible factor from arbuscular mycorrhizal fungi induces symbiosis-specific MtENOD11 expression in roots of *Medicago truncatula*. *Plant Physiol* 131: 952–962.
- Chandanie WA, Kubota M, Hyakumachi M (2009) Interactions between the arbuscular mycorrhizal fungus *Glomus mosseae* and plant growth-promoting fungi and their significance for enhancing plant growth and suppressing damping-off of cucumber (*Cucumis sativus* L.). *Appl Soil Ecol* 41: 336–341.
- Dar GH, Zargar MY, Beigh GM (1997) Biocontrol of Fusarium root-rot in the common bean (*Phaseolus vulgaris* L.) by using symbiotic *Glomus mosseae* and *Rhizobium leguminosarum*. *Microb Ecol* 34: 74–80.
- Arfaoui A, Sifi B, El Hassni M, El Hadrami I, Boudabous A, et al. (2005) Biochemical analysis of chickpea protection against Fusarium wilt afforded by two *Rhizobium* isolates. *Plant Pathol J* 4: 35–42.
- Smith SE, Gianinazzi-Pearson V (1988) Physiological interactions between symbionts in vesicular-arbuscular mycorrhizal plants. *Annu Rev Plant Physiol Plant Mol Biol* 39: 221–244.
- Breil BT, Borneman J, Triplett EW (1996) A newly discovered gene, *tfuA*, involved in the production of ribosomally synthesized peptide antibiotic trifolitoxin. *J Bacteriol* 178: 4150–4156.
- Cordier C, Pozo MJ, Barea JM, Gianinazzi S, Gianinazzi-Pearson V (1998) Cell defense responses associated with localized and systemic resistance to *Phytophthora parasitica* induced in tomato by an arbuscular mycorrhizal fungus. *Mol Plant Microbe Interact* 11: 1017–1028.
- Huang HC, Erickson RS (2007) Effect of seed treatment with *Rhizobium leguminosarum* on *Pythium* damping-off, seedling height, root nodulation, root biomass, shoot biomass, and seed yield of pea and lentil. *J Phytopathol* 155: 31–37.
- Arfaoui A, El Hadrami A, Mabrouk Y, Sifi B, Boudabous A, et al. (2007) Treatment of chickpea with *Rhizobium* isolates enhances the expression of phenylpropanoid defense-related genes in response to infection by *Fusarium oxysporum* f. sp. *ciceris*. *Plant Physiol Bioch* 45: 470–479.
- Lisette J, Xavier C, Germida J (2003) Selective interactions between arbuscular mycorrhizal fungi and *Rhizobium leguminosarum* bv. *viciae* enhance pea yield and nutrition. *Biol Fertil Soils* 37: 261–267.
- Wang XR, Pan Q, Chen FX, Yan XL, Liao H (2011) Effects of co-inoculation with arbuscular mycorrhizal fungi and rhizobia on soybean growth as related to root architecture and availability of N and P. *Mycorrhiza* 21: 173–181.
- Estevez JC, Percich JA, Graham PH (2002) Integrated management strategies of bean root rot with *Bacillus subtilis* and *Rhizobium* in Minnesota. *Field Crops Res* 74: 107–115.
- Akhtar MS, Shakeel U, Siddiqui ZA (2010) Biocontrol of Fusarium wilt by *Bacillus pumilus*, *Pseudomonas alcaligenes*, and *Rhizobium* sp. on lentil. *Turk J Biol* 32: 1–7.
- Lugtenberg BJ, Dekkers LC, Bloemberg GV (2001) Molecular determinants of rhizosphere colonization by *Pseudomonas*. *Annu Rev Phytopathol* 39: 461–490.
- Weller DM (1983) Colonization of wheat roots by a Fluorescent Pseudomonad suppressive to take-all. *Phytopathology* 73: 1548–1553.
- Vigo C, Norman JR, Hooker JE (2000) Biocontrol of pathogen *Phytophthora parasitica* by arbuscular mycorrhizal fungi is a consequence of effects on infection loci. *Plant Pathol* 49: 509–514.
- Kraus J, Loper JE (1995) Characterization of a genomic region required for production of the antibiotic pyoluteorin by the biological control agent *Pseudomonas fluorescens* Pf-d. *Appl Environ Microbiol* 61: 849–854.
- Raaijmakers JM, Weller DM, Thomashow LS (1997) Frequency of antibiotic-producing *Pseudomonas* spp. in natural environments. *Appl Environ Microbiol* 63: 881–887.
- Compant S, Duffy B, Nowak J, Clément C, Barka EA (2005) Use of plant growth-promoting bacteria for biocontrol of plant diseases: principles, mechanisms of action, and future prospects. *Appl Environ Microbiol* 71: 4951–4959.
- Parniske M (2000) Intracellular accommodation of microbes by plants: a common developmental program for symbiosis and disease? *Curr Opin Plant Biol* 3: 320–328.
- Aysan E, Demir S (2009) Using arbuscular mycorrhizal fungi and *Rhizobium leguminosarum* biovar *phaseoli* against *Sclerotinia sclerotiorum* (Lib.) de bary in the common bean (*Phaseolus vulgaris* L.). *Plant Pathol J* 8: 74–78.
- Clark RB, Zeto SK (2000) Mineral acquisition by arbuscular mycorrhizal plants. *J Plant Nutr* 23: 867–902.
- Siddiqui ZA, Singh LP (2004) Effects of soil inoculants on the growth, transpiration and wilt disease of chickpea. *J Plant Dis Protect* 111: 151–157.
- Huber DM (1980) The role of mineral nutrition in defense. In: Horsfall JG, Cowling EB, eds. *Plant Disease. An advanced treatise*, Volume 5, How plants defend themselves Academic. New York. pp 381–406.
- Dordas C (2008) Role of nutrients in controlling plant disease in sustainable agriculture: A review. *Agron Sustain Dev* 28: 33–46.
- Parnike M (2004) Molecular genetics of the arbuscular mycorrhizal symbiosis. *Curr Opin Plant Biol* 7: 414–421.

## Acknowledgments

We thank Mingfang Guan, Hui Jiang, Xinping Chen, Ruineng Xu and Zuotong He for helps in field and lab experiments, and Dr. Zide Jiang for his guidance on pathogen analysis.

## Author Contributions

Conceived and designed the experiments: XG HL. Performed the experiments: XG MW HZ. Analyzed the data: XG XL MW JT HL. Contributed reagents/materials/analysis tools: XG HL. Wrote the paper: XG XL JT HL. Guided the plant pathology experiments: RP SL.

44. Arfaoui A, Sifi B, Boudabous A, El Hadrami I, Cherif M, et al. (2006) Identification of *Rhizobium* isolates possessing antagonistic activity against *Fusarium oxysporum* f. sp. *ciceris*, the causal agent of Fusarium wilt of chickpea. *J Plant Pathol* 88: 67–75.
45. Ismail Y, McCormick S, Hijri M (2011) A fungal symbiont of plant-roots modulates mycotoxin gene expression in the pathogen *Fusarium sambucinum*. *PLoS ONE* 6(3): e17990. doi: 10.1371/journal.pone.0017990.
46. Song YY, Zeng RS, Xu JF, Li J, Shen X, et al. (2010) Interplant communication of tomato plants through underground common mycorrhizal networks. *PLoS ONE* 5(10): e13324. doi: 10.1371/journal.pone.0013324.
47. Robert GU, Martha ER (2010) Defense-related gene expression in soybean leaves and seeds inoculated with *Cercospora kikuchii* and *Diaporthe phaseolorum* var. *Meridionalis*. *Physiol Mol Plant P* 75: 64–70.
48. Samac DA, Graham MA (2007) Recent advances in legume-microbe interactions: recognition, defense response, and symbiosis from a genomic perspective. *Plant Physiol* 144: 582–587.
49. Liu J, Maldonado-Mendoza I, Lopez-Meyer M, Cheung F, Town CD, et al. (2007) Arbuscular mycorrhizal symbiosis is accompanied by local and systemic alterations in gene expression and an increase in disease resistance in the shoots. *Plant J* 50: 529–544.
50. Mishra RPN, Singh RK, Jaiswal HK, Kumar V, Maurya S (2006) *Rhizobium* mediated induction of phenolics and plant growth promotion in rice (*Oryza sativa* L.). *Curr Microbiol* 8: 383–389.
51. Pozo MJ, Cordier C, Dumas-Gaudot E, Gianinazzi S, Barea JM, et al. (2002) Localized vs systemic effect of arbuscular mycorrhizal fungi on defense response to *Phytophthora* infection in tomato plants. *J Exp Bot* 53: 525–534.
52. Yao MK, Desilets H, Charles MT, Boulanger R, Tweddell RJ (2003) Effect of mycorrhization on the accumulation of rishitin and solavetivone in potato plantlets challenged with *Rhizoctonia solani*. *Mycorrhiza* 13: 333–336.
53. Zhao S, Qi X (2008) Signaling in plant disease resistance and symbiosis. *J Integr Plant Biol* 50: 799–807.
54. Murphy J, Riley JP (1962) A modified single solution method for the determination of phosphate in natural waters. *Anal Chim Acta* 27: 31–36.
55. Nishi K, Sato F, Karasawa T, Sato T, Fukuta T, et al. (1999) Ecology and control of root necrosis of soybean caused by *Calonectria crotalariae*. *Bull Nat Agric Res* 30: 100–109.
56. Li C, He X, Zhu S, Zhou H, Wang Y, et al. (2009) Crop diversity for yield increase. *PLoS ONE* 4(11): e8049. doi: 10.1371/journal.pone.0008049.
57. Vierheilig H, Coughlan AP, Wyss U, Piché Y (1998) Ink and vinegar, a simple staining technique for arbuscular-mycorrhizal fungi. *Appl Environ Microb* 64: 5004–5007.
58. Qin L, Jiang H, Tian J, Zhao J, Liao H (2011) Rhizobia enhance acquisition of phosphorus from different sources by soybean plants. *Plant Soil* doi: 10.1007/s11104-011-0947-z.
59. Li S, Hartman GL, Domir LL, Boykin D (2008) Quantification of *Fusarium solani* f. sp. *glycines* isolates in soybean roots by colony-forming unit assays and real-time quantitative PCR. *Theor Appl Genet* 117: 343–352.
60. Banwart WL, Porter PM, Granato TC, Hassett JJ (1985) HPLC separation and wavelength area ratios of more than 50 phenolic acids and flavonoids. *J Chem Ecol* 11: 383–395.
61. Guo WB, Zhao J, Li XX, Qin L, Yan XL, et al. (2011) A soybean  $\beta$ -expansin gene *GmEXPB2* intrinsically involved in root system architecture responses to abiotic stresses. *Plant J* 66: 541–552.
